# Supplementary material
Source: PubMed Central journal article supplement (PMC4112007)
Supplement: NIHMS607111-supplement.pdf [file NIHMS607111-supplement.pdf]

## **Supplementary Material**

for

### **Meta-Analytic Connectivity Modelling Revisited: Controlling for Activation Base Rates**

Robert Langner, Claudia Rottschy, Angela R. Laird, Peter T. Fox,  
& Simon B. Eickhoff

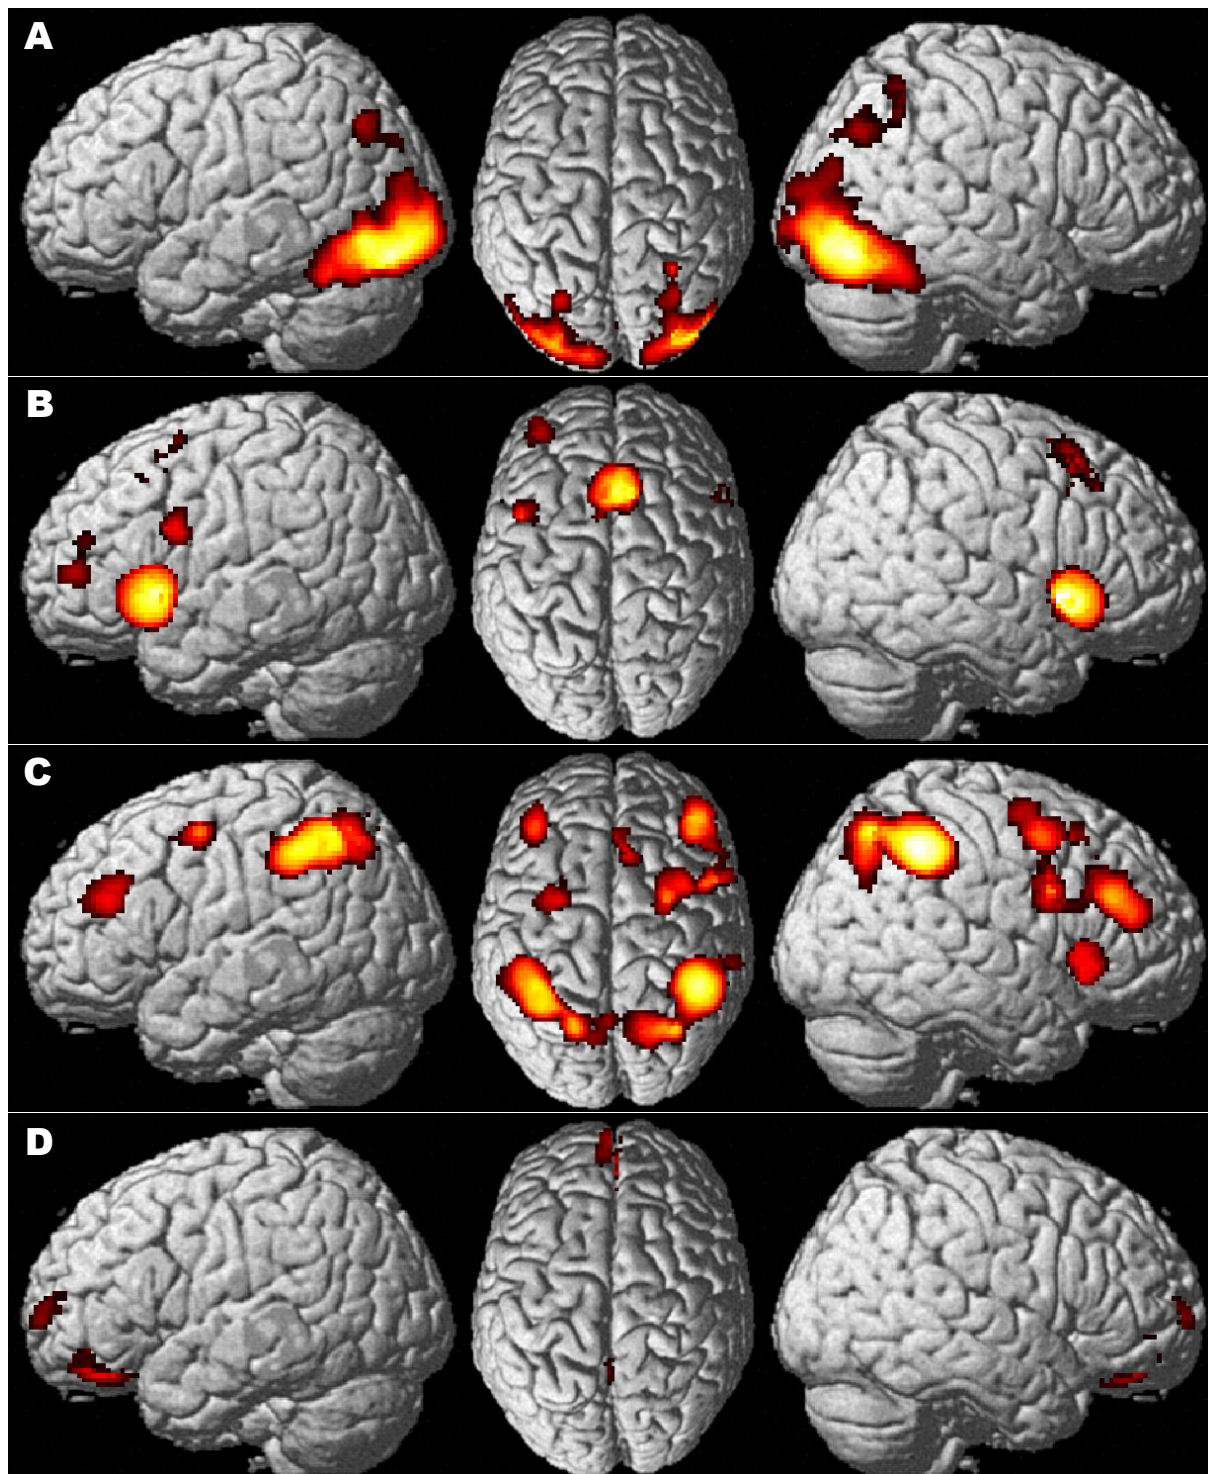

Fig. S1. Results of conjunctions (strict minimum statistic) across results of both standard and modified MACM algorithms done separately for each of the four exemplary seeds: (A) area hOC4v, (B) left anterior insula, (C) right intraparietal sulcus, (D) subgenual cingulum.
